# Supplementary material for: Direct mechanosynthesis of pure BiFeO3 perovskite nanoparticles: reaction mechanism
Source: Royal Society of Chemistry journal article supplement (doi:10.1039/c3tc30446a), 2013-01-01
Supplement: c3tc30446a.pdf [file c3tc30446a.pdf]

## Direct mechanosynthesis of pure $\text{BiFeO}_3$ perovskite nanoparticles: reaction mechanism.

Antonio Perejón<sup>a</sup>, Nataliya Murafa<sup>b</sup>, Pedro E. Sánchez-Jiménez<sup>a</sup>, José M. Criado<sup>a</sup>, Jan Subrt<sup>b</sup>, María J. Diáñez<sup>a</sup>, Luis A. Pérez-Maqueda<sup>\*a</sup>

### Supplementary Information

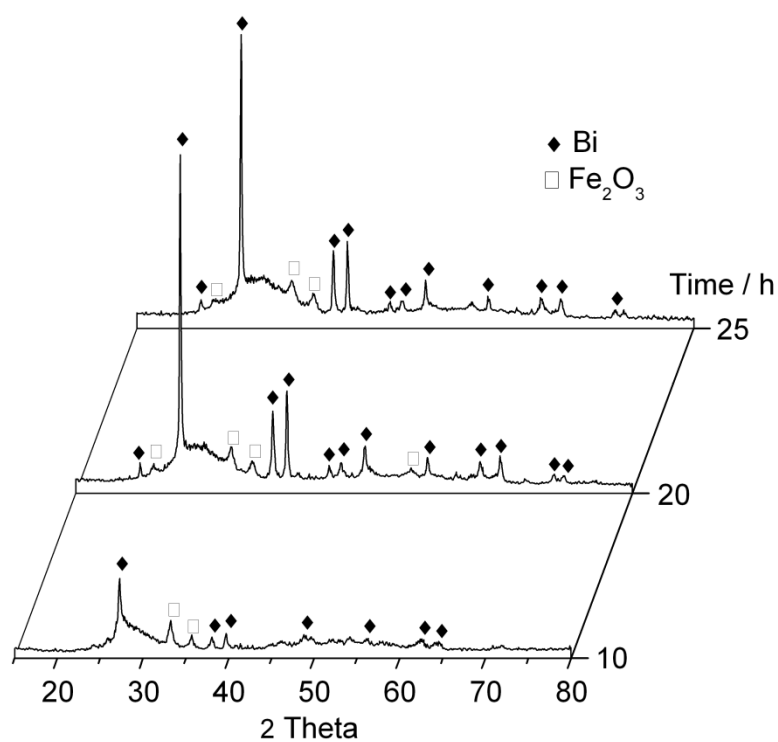

**Fig. S1.** Diffraction patterns of the solids obtained after milling the stoichiometric amounts of the single oxides for different periods of time in nitrogen (7 bar) under experimental conditions 1 (table 1).

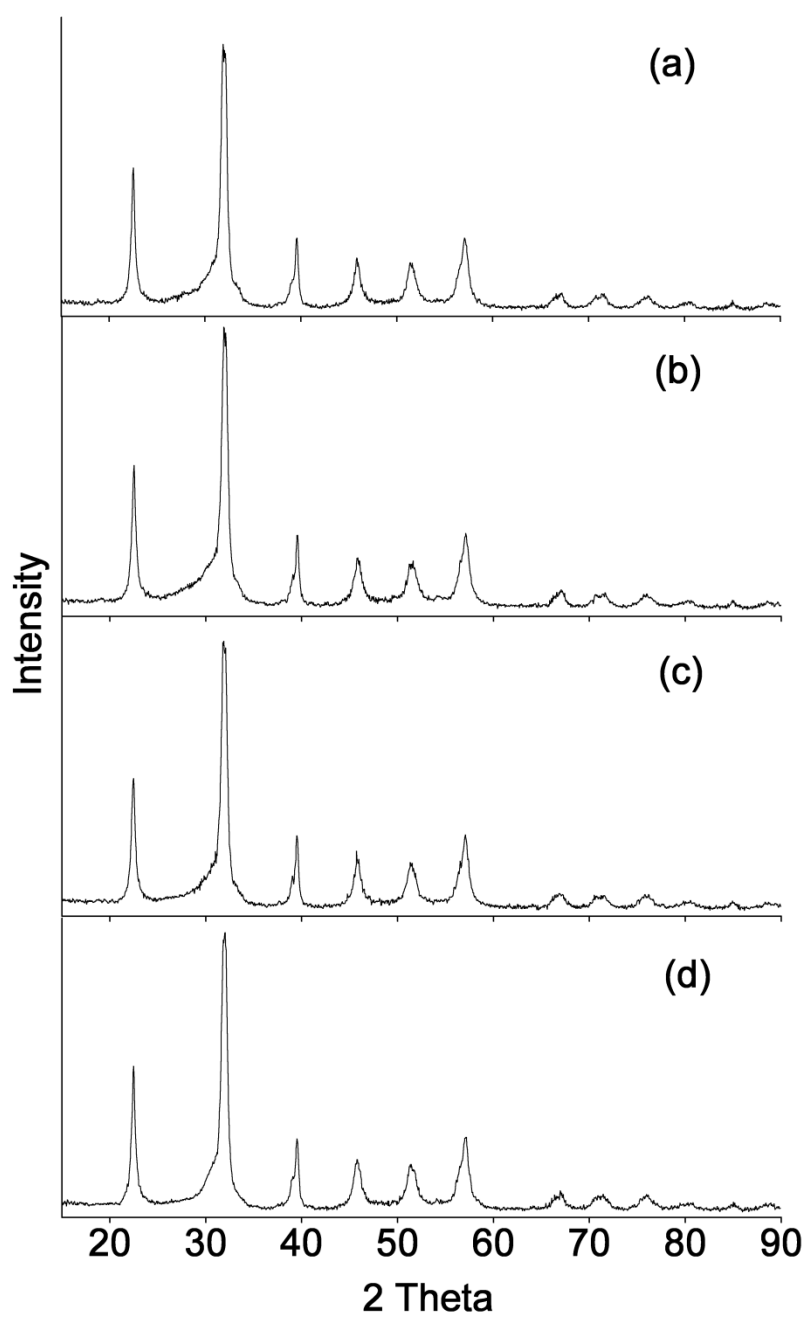

**Fig. S2.** Diffraction patterns of the solids obtained after milling the stoichiometric amounts of the single oxides in experimental conditions 2 (fig a), 4 (fig b), 5 (fig c) and 6 (fig d). See table 1.

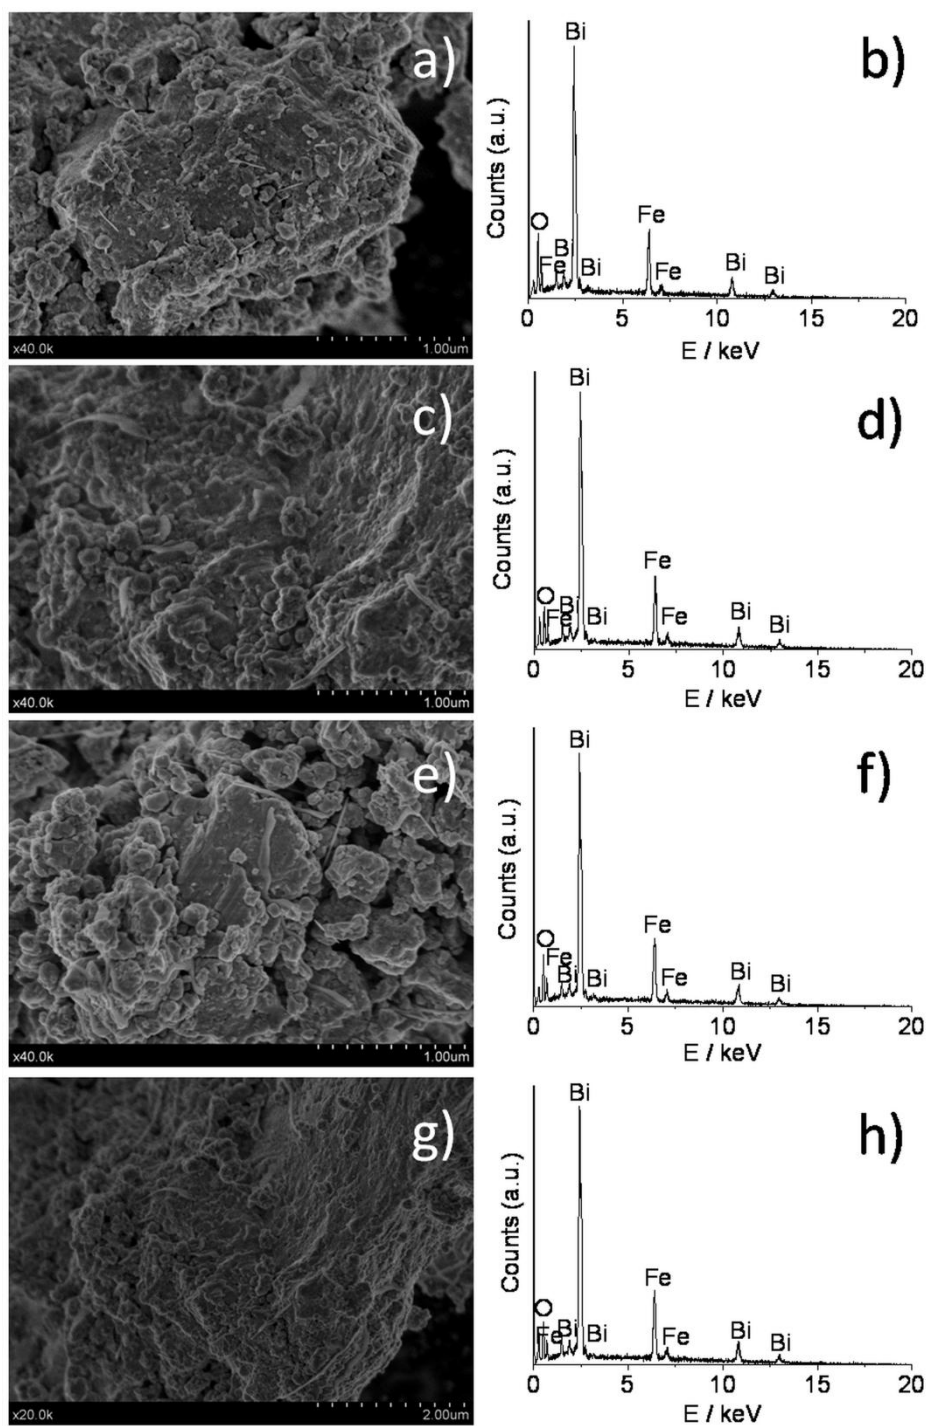

**Fig. S3.** Scanning electron micrographs and EDX spectra of the powders obtained after milling the stoichiometric amounts of the single oxides in experimental conditions 1 (fig a,b), 4 (fig c,d), 5 (fig e,f) and 6 (fig g,h). See table 1.

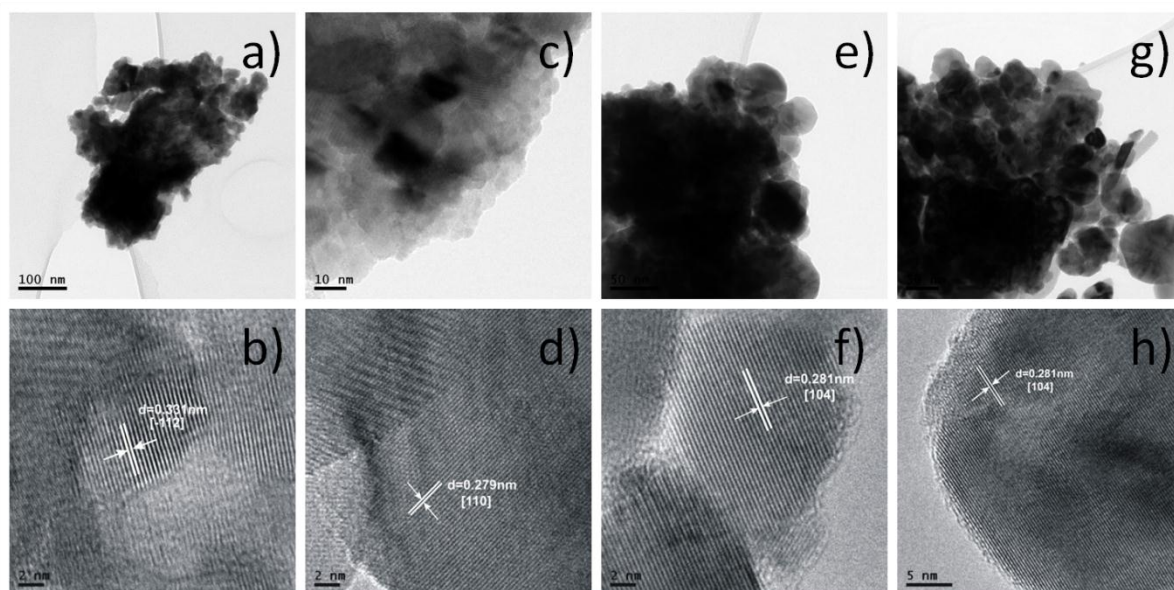

**Fig. S4.** TEM micrographs of the powder after 0.25 (a, b), 8 (c, d), 20 (e, f) and 25 (g, h) hours of milling under milling conditions 1.

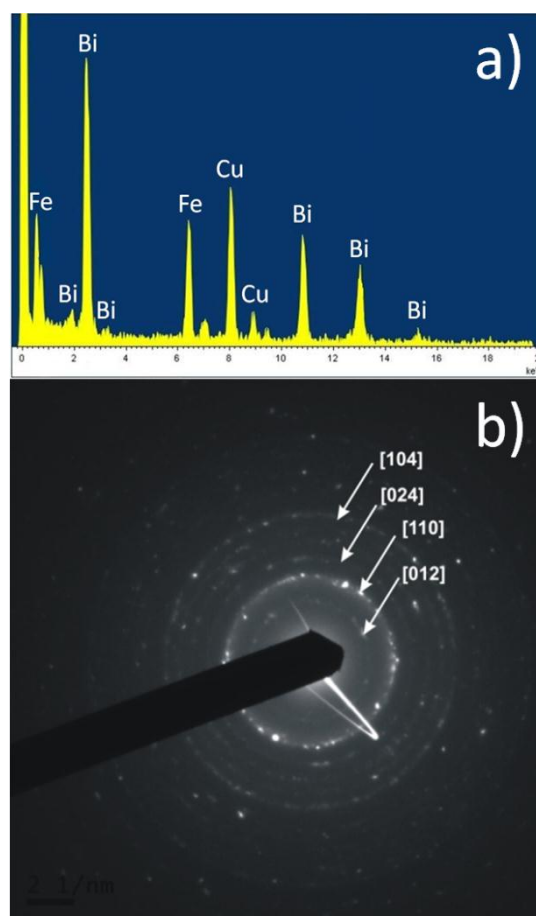

**Fig. S5.** EDX analysis (a) and electron diffraction pattern of the final product after 25 hours of milling under milling conditions 1.

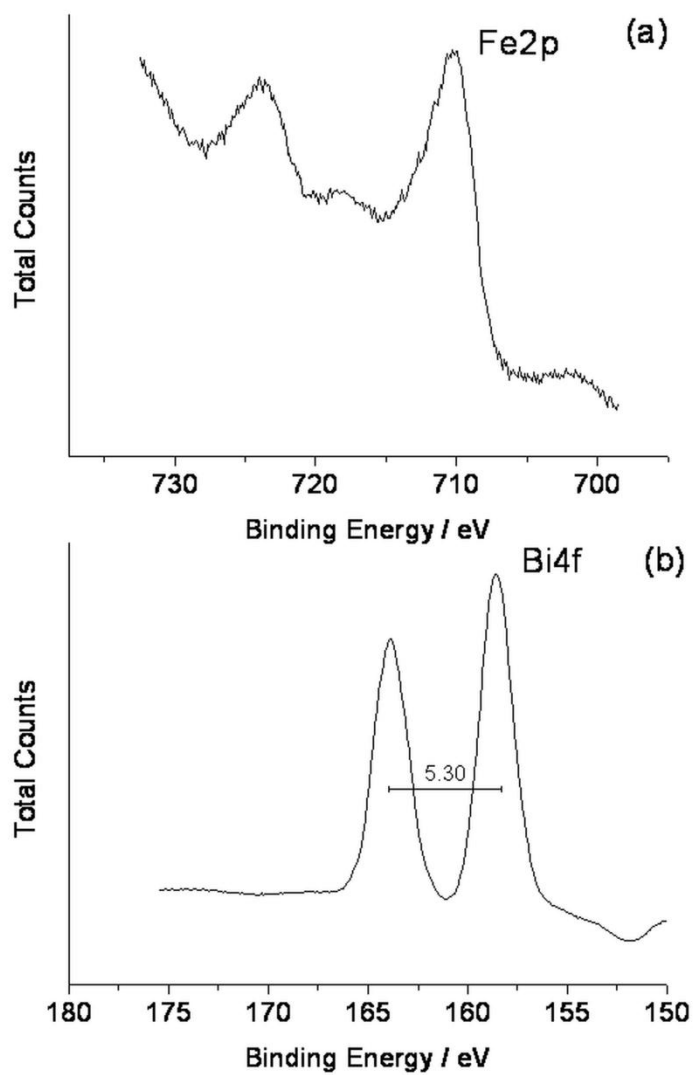

**Fig. S6.** XPS spectra for Fe2p (a) and for Bi4f (b) for the as ground powders obtained under milling conditions 3.
